# Supplementary material for: Life cycle assessment as a tool for evaluating chemical processes at industrial scale: a review
Source: Royal Society of Chemistry journal article supplement (doi:10.1039/d2gc02089k), 2022-01-01
Supplement: d2gc02089k1.xlsx [file d2gc02089k1.xlsx]

## Sheet: Hoja1
Authors	Title	Year	Journal
Al-Mawali, Kamla S.; Osman, Ahmed I.; Al-Muhtaseb, Ala'a H.; Mehta, Neha; Jamil, Farrukh; Mjalli, Farouk; Vakili-Nezhaad, G. Reza; Rooney, David W.	Life cycle assessment of biodiesel production utilising waste date seed oil and a novel magnetic catalyst: A circular bioeconomy approach	2021	Renewable Energy
Barros, Ramoon; Temporim, Lovate; Cavalaglio, Gianluca; Gelosia, Mattia; Giannoni, Tommaso; Nicolini, Andrea; Cotana, Franco; Bertini, Alessandro	Acid-catalyzed steam explosion for high enzymatic saccharification and low inhibitor release from lignocellulosic cardoon stalks	2021	Biochemical Engineering Journal
Boonrod, Bulin; Prapainainar, Paweena; Varabuntoonvit, Viganda; Sudsakorn, Kandis; Prapainainar, Chaiwat	Environmental impact assessment of bio-hydrogenated diesel from hydrogen and co-product of palm oil industry	2021	International Journal of Hydrogen Energy
Chauvy, Remi; Verdonck, Damien; Dubois, Lionel; Thomas, Diane; De Weireld, Guy	Techno-economic feasibility and sustainability of an integrated carbon capture and conversion process to synthetic natural gas	2021	Journal of CO2 Utilization
Gallego-Villada, Luis A.; Hasenstab, Christian; Alarcón, Edwin A.; Villa, Aída Luz	Identification by Life Cycle Assessment of the critical stage in the catalytic synthesis of nopol using heterogeneous catalysis	2021	Sustainable Production and Consumption
Guzmán, Hilmar; Salomone, Fabio; Batuecas, Esperanza; Tommasi, Tonia; Russo, Nunzio; Bensaid, Samir; Hernández, Simelys	How to make sustainable CO2 conversion to Methanol: Thermocatalytic versus electrocatalytic technology	2021	Chemical Engineering Journal
Luo, Hongxi; Cheng, Fangwei; Huelsenbeck, Luke; Smith, Natalie	Comparison between conventional solvothermal and aqueous solution-based production of UiO-66-NH2: Life cycle assessment, techno-economic assessment, and implications for CO2capture and storage	2021	Journal of Environmental Chemical Engineering
Saavedra del Oso, M.; Mauricio-Iglesias, M.; Hospido, A.	Evaluation and optimization of the environmental performance of PHA downstream processing	2021	Chemical Engineering Journal
Zhao, Zhitong; Jiang, Jingyang; Zheng, Mingyuan; Wang, Feng	Advancing development of biochemicals through the comprehensive evaluation of bio-ethylene glycol	2021	Chemical Engineering Journal
Zhou, Xin; Zhao, Mingyue; Sheng, Nan; Tang, Lei; Feng, Xiang; Zhao, Hui; Liu, Yibin; Chen, Xiaobo	Enhancing light olefins and aromatics production from naphthenic-based vacuum gas oil: Process integration, techno-economic analysis and life cycle environmental assessment	2021	Computers and Chemical Engineering
Bello, Sara; Méndez-Trelles, Pedro; Rodil, Eva; Feijoo, Gumersindo; Moreira, Maria Teresa	Towards improving the sustainability of bioplastics: Process modelling and life cycle assessment of two separation routes for 2,5-furandicarboxylic acid	2020	Separation and Purification Technology
Gomez, Jamie R.; Baca, John; Garzon, Fernando	Techno-economic analysis and life cycle assessment for electrochemical ammonia production using proton conducting membrane	2020	International Journal of Hydrogen Energy
Heidari, Ava; Younesi, Habibollah	Synthesis, characterization and life cycle assessment of carbon nanospheres from waste tires pyrolysis over ferrocene catalyst	2020	Journal of Environmental Chemical Engineering
Sadeek, Sherard; Lee Chan, Thérèse; Ramdath, Rukam; Rajkumar, Aqueel; Guo, Miao; Ward, Keeran	The influence of raw material availability and utility power consumption on the sustainability of the ammonia process	2020	Chemical Engineering Research and Design
Santiago, Beatriz; Arias Calvo, Ana; Gullón, Beatriz; Feijoo, Gumersindo; Moreira, Maria Teresa; González-García, Sara	Production of flavonol quercetin and fructooligosaccharides from onion (Allium cepa L.) waste: An environmental life cycle approach	2020	Chemical Engineering Journal
Siegert, Marc William; Saling, Peter; Mielke, Pascal; Czechmann, Carolin; Emara, Yasmine; Finkbeiner, Matthias	Cradle-to-grave life cycle assessment of an ibuprofen analgesic	2020	Sustainable Chemistry and Pharmacy
Taher, Hanifa; Giwa, Adewale; Abusabiekeh, Hana; Al-Zuhair, Sulaiman	Biodiesel production from Nannochloropsis gaditana using supercritical CO2 for lipid extraction and immobilized lipase transesterification: Economic and environmental impact assessments	2020	Fuel Processing Technology
Morales-Gonzalez, O. M.; Zhang, C.; Li, S.; Hessel, V.	Solvent impact assessment for the “One-Flow Functional Solvent Factory”	2019	Chemical Engineering Science: X
Pillain, Baptiste; Loubet, Philippe; Pestalozzi, Fadri; Woidasky, Joerg; Erriguible, Arnaud; Aymonier, Cyril; Sonnemann, Guido	Positioning supercritical solvolysis among innovative recycling and current waste management scenarios for carbon fiber reinforced plastics thanks to comparative life cycle assessment	2019	Journal of Supercritical Fluids
Shiu, Huan Yu; Lee, Mengshan; Chao, Ying; Chang, Kuang Chih; Hou, Chia Hung; Chiueh, Pei Te	Hotspot analysis and improvement schemes for capacitive deionization (CDI) using life cycle assessment	2019	Desalination
Di Marcoberardino, Gioele; Manzolini, Giampaolo; Guignard, Cécile; Magaud, Violaine	Optimization of a micro-CHP system based on polymer electrolyte membrane fuel cell and membrane reactor from economic and life cycle assessment point of view	2018	Chemical Engineering and Processing - Process Intensification
González-García, Sara; Argiz, Lucía; Míguez, Patricia; Gullón, Beatriz	Exploring the production of bio-succinic acid from apple pomace using an environmental approach	2018	Chemical Engineering Journal
Zhang, Dongda; del Rio-Chanona, Ehecatl Antonio; Wagner, Jonathan L.; Shah, Nilay	Life cycle assessments of bio-based sustainable polylimonene carbonate production processes	2018	Sustainable Production and Consumption
Battista, F.; Montenegro Camacho, Y. S.; Hernández, S.; Bensaid, S.; Herrmann, A.; Krause, H.; Trimis, D.; Fino, D.	LCA evaluation for the hydrogen production from biogas through the innovative BioRobur project concept	2017	International Journal of Hydrogen Energy
Deng, Yelin; Li, Jianyang; Li, Tonghui; Gao, Xianfeng; Yuan, Chris	Life cycle assessment of lithium sulfur battery for electric vehicles	2017	Journal of Power Sources
Van Kalkeren, Henri A.; Blom, Anneloes L.; Rutjes, Floris P.J.T.; Huijbregts, Mark A.J.	On the usefulness of life cycle assessment in early chemical methodology development: The case of organophosphorus-catalyzed Appel and Wittig reactions	2013	Green Chemistry
Kiss, Ferenc E.; Micic, Radoslav D.; Tomić, Milan D.; Nikolić-Djorić, Emilija B.; Simikić, Mirko C.D.S.	Supercritical transesterification: Impact of different types of alcohol on biodiesel yield and LCA results	2014	Journal of Supercritical Fluids
Susmozas, Ana; Iribarren, Diego; Zapp, Petra; Linβen, Jochen; Dufour, Javier	Life-cycle performance of hydrogen production via indirect biomass gasification with CO2 capture	2016	International Journal of Hydrogen Energy
Hajjaji, Noureddine; Martinez, Sylvain; Trably, Eric; Steyer, Jean Philippe; Helias, Arnaud	Life cycle assessment of hydrogen production from biogas reforming	2016	International Journal of Hydrogen Energy
Giraldi, Mario R.; Franҫois, Juan Luis; Martin-Del-Campo, Cecilia	Life cycle assessment of hydrogen production from a high temperature electrolysis process coupled to a high temperature gas nuclear reactor	2015	International Journal of Hydrogen Energy
Postels, Sarah; Abánades, Alberto; von der Assen, Niklas; Rathnam, Renu Kumar; Stückrad, Stefan	Life cycle assessment of hydrogen production by thermal cracking of methane based on liquid-metal technology	2016	International Journal of Hydrogen Energy
Patyk, Andreas; Bachmann, Till M.; Brisse, Annabelle	Life cycle assessment of H2 generation with high temperature electrolysis	2013	International Journal of Hydrogen Energy
Wang, Qi; Vural Gürsel, Iris; Shang, Minjing; Hessel, Volker	Life cycle assessment for the direct synthesis of adipic acid in microreactors and benchmarking to the commercial process	2013	Chemical Engineering Journal
Morales-Mora, M. A.; Rosa-Dominguez, E.; Suppen-Reynaga, N.; Martinez-Delgadillo, S. A.	Environmental and eco-costs life cycle assessment of an acrylonitrile process by capacity enlargement in Mexico	2012	Process Safety and Environmental Protection
Pereira, Lucas G.; Dias, Marina O.S.; Junqueira, Tassia L.; Pavanello, Lucas G.; Chagas, Mateus F.	Butanol production in a sugarcane biorefinery using ethanol as feedstock. Part II: Integration to a second generation sugarcane distillery	2014	Chemical Engineering Research and Design
Ofori-Boateng, Cynthia; Lee, Keat Teong	An oil palm-based biorefinery concept for cellulosic ethanol and phytochemicals production: Sustainability evaluation using exergetic life cycle assessment	2014	Applied Thermal Engineering
Lu, Jiaqi; Kumagai, Shogo; Fukushima, Yasuhiro; Ohno, Hajime; Kameda, Tomohito; Saito, Yuko; Yoshioka, Toshiaki	Combined Experiment, Simulation, and Ex-ante LCA Approach for Sustainable Cl Recovery from NaCl/Ethylene Glycol by Electrodialysis	2020	Industrial and Engineering Chemistry Research
Larnaudie, Valeria; Bule, Mahesh; San, Ka-Yiu; Vadlani, Praveen V.; Mosby, James; Elangovan, S.; Karanjikar, Mukund; Spatari, Sabrina	Life cycle environmental and cost evaluation of renewable diesel production	2020	Fuel
Mediboyina, Maneesh Kumar; Banuvalli, Bhavana Karibasappa; Chauhan, Vikas Singh; Mudliar, Sandeep Narayan	Comparative life cycle assessment of autotrophic cultivation of Scenedesmus dimorphus in raceway pond coupled to biodiesel and biogas production	2020	Bioprocess and Biosystems Engineering
Iribarren, Diego; Susmozas, Ana; Dufour, Javier	Life-cycle assessment of Fischer-Tropsch products from biosyngas	2013	Renewable energy
Wang, Mingxin; Chen, Yahui; Xia, Xunfeng; Li, Jun; Liu, Jianguo	Energy efficiency and environmental performance of bioethanol production from sweet sorghum stem based on life cycle analysis	2014	Bioresource technology
Susmozas, Ana; Iribarren, Diego; Dufour, Javier	Life-cycle performance of indirect biomass gasification as a green alternative to steam methane reforming for hydrogen production	2013	International journal of hydrogen energy
Amelio, Antonio; Genduso, Giuseppe; Vreysen, Steven; Luis, Patricia; Van Der Bruggen, Bart	Guidelines based on life cycle assessment for solvent selection during the process design and evaluation of treatment alternatives	2014	Green chemistry
Riazi, Bahar; Zhang, Jianwei; Yee, Winnie; Ngo, Helen; Spatari, Sabrina	Life Cycle Environmental and Cost Implications of Isostearic Acid Production for Pharmaceutical and Personal Care Products	2019	Acs sustainable chemistry & engineering
Lindorfer, Johannes ; Reiter, Gerda	Global warming potential of hydrogen and methane production from renewable electricity via power-to-gas technology	2015	The International Journal of Life Cycle Assessment
Rojas-Bringas, Pedro M.; De-la-Torre, Gabriel E.; Torres, Fernando G.	Influence of the source of starch and plasticizers on the environmental burden of starch-Brazil nut fiber biocomposite production: A life cycle assessment approach	2020	Science of the Total Environment
Yaseneva, Polina; Plaza, Dorota; Fan, Xiaolei; Loponov, Konstantin; Lapkin, Alexei	Synthesis of the antimalarial API artemether in a flow reactor	2014	Catalysis Today
